# Supplementary material for: CovidShiny: An Integrated Web Tool for SARS-CoV-2 Mutation Profiling and Molecular Diagnosis Assay Evaluation In Silico
Source: MDPI journal article supplement (doi:10.3390/v15102017), 2023-09-28
Supplement: s1 [file s1]

**Supplementary Table S1. Primer and probe information for popular Commonly used Assays for SARS-Cov-2.**

| Institute/Count | Assay           | Forward.primer(5' -     | Reverser.primer(5' -    | Probe(5' - 3')                          | Referen |
|-----------------|-----------------|-------------------------|-------------------------|-----------------------------------------|---------|
| China CDC       | ChinaCDC-ORF1ab | CCCTGTGGGTTTACACTTAA    | ACGATTGTGCATCAGCTGA     | FAM-CCGTCTGCGGTATGTGGAAAGGTTATGG-BHQ1   | 55      |
| China CDC       | ChinaCDC-N      | GGGGAACCTCTCCTGCTAGAAT  | CAGACATTTGCTCTCAAGCTG   | FAM-TTGCTGCTGCTTGACAGATT-BHQ1           |         |
| Charite         | Charite-RdRP    | GTGARATGGTCATGTGTGGCGG  | CARATGTAAASACACTATTAGC  | FAM-CCAGGTGGWACRTCATCMGGTGATGC-BHQ1     | 27      |
| Charite         | Charite-E       | ACAGGTACGTTAATAGTTAATAG | ATATTGCAGCAGTACGCACACA  | FAM-ACACTAGCCATCCTTACTGCGCTTCG-BHQ1     |         |
| HKU             | HKU-ORF1b       | TGGGGYTTACRGGTAACCT     | AACRCGCTTAACAAAGCACTC   | FAM/ZEN-TAGTTGTGTGATGCWATCATGACTAG-IBEQ | 54      |
| HKU             | HKU-N           | TAATCAGACAAGGAAGTATTA   | CGAAGGTGTGACTTCCATG     | FAM/ZEN-GCAAATTGTGCAATTTGCGG-IBFQ       |         |
| US CDC          | USACDC-N1       | GACCCCAAAATCAGCGAAAT    | TCTGGTTACTGCCAGTTGAATCT | FAM-ACCCCGCATTACGTTTGGTGGACC-BHQ1       | 61      |
| US CDC          | USACDC-N2       | TTACAAACATTGGCCGCAAA    | GCGCGACATTCCGAAGAA      | FAM-ACAATTGCCCCAGCGTTAG-BHQ1            |         |
| US CDC          | USACDC-N3       | GGGAGCCTTGAATACACCAAAA  | TGTAGCACGATTGCAGCATTG   | FAM-AYCACATTGGCACCCGCA ATCCTG-BHQ1      |         |
| Thailand        | Thailand-N      | CGTTTGGTGGACCCTCAGAT    | AATGGAGAACGCAGTGGGG     | FAM-CAACTGGCAGTAACCA-BQH1               | 62      |
| Paris           | IP2             | ATGAGCTTAGTCCTGTTG      | CTCCCTTGTGTGTGTGT       | Hex-AGATGTCTGTGTGCTGCCGTA-BHQ-1         | 51      |
| Paris           | IP4             | GGTAACTGGTATGATTTTCG    | CTGGTCAAGGTTAATATAGG    | FAM-TCATACAAACCACGCCAGG-BHQ-1           |         |
| Japan           | Japan-NIID-N    | AAATTTTGGGGACCAGGAAC    | TGGCAGCTGTGTAGGTCAAC    | FAM-ATGTCGCGCATTGGCATGGA-BHQ1           | 52      |

## References

- 27 Corman, V.M.; Landt, O.; Kaiser, M.; Molenkamp, R.; Meijer, A.; Chu, D.K.; Bleicker, T.; Brunink, S.; Schneider, J.; Schmidt, M.L.; et al. Detection of 2019 novel coronavirus (2019-nCoV) by real-time RT-PCR. *Euro. Surveill.* **2020**, *25*, 2000045. <https://doi.org/10.2807/1560-7917.ES.2020.25.3.2000045>.
- 50 Diagnostic Detection of Novel Coronavirus 2019 by Real Time RT-PCR. Available online: [https://www.who.int/docs/default-source/coronaviruse/conventional-rt-pcr-followed-by-sequencing-for-detection-of-ncov-rirl-nat-inst-health-t.pdf?sfvrsn=42271c6d\\_4](https://www.who.int/docs/default-source/coronaviruse/conventional-rt-pcr-followed-by-sequencing-for-detection-of-ncov-rirl-nat-inst-health-t.pdf?sfvrsn=42271c6d_4) (accessed on 21 September 2023).
- 51 Real-Time RT-PCR Assays for the Detection of SARS-CoV-2. Available online: [https://www.who.int/docs/default-source/coronaviruse/real-time-rt-pcr-assays-for-the-detection-of-sars-cov-2-institut-pasteur-paris.pdf?sfvrsn=3662fcb6\\_2](https://www.who.int/docs/default-source/coronaviruse/real-time-rt-pcr-assays-for-the-detection-of-sars-cov-2-institut-pasteur-paris.pdf?sfvrsn=3662fcb6_2) (accessed on 21 September 2023).
- 52 Shirato, K.; Nao, N.; Katano, H.; Takayama, I.; Saito, S.; Kato, F.; Katoh, H.; Sakata, M.; Nakatsu, Y.; Mori, Y.; et al. Development of Genetic Diagnostic Methods for Detection for Novel Coronavirus 2019 (nCoV-2019) in Japan. *Jpn J. Infect. Dis.* **2020**, *73*, 304–307.
- 54 Chu, D.K.W.; Pan, Y.; Cheng, S.M.S.; Hui, K.P.Y.; Krishnan, P.; Liu, Y.; Ng, D.Y.M.; Wan, C.K.C.; Yang, P.; Wang, Q.; et al. Molecular Diagnosis of a Novel Coronavirus (2019-nCoV) Causing an Outbreak of Pneumonia. *Clin. Chem.* **2020**, *66*, 549–555.
- 55 Specific Primers and Probes for Detection 2019 Novel Coronavirus. Available online: [https://ivdc.chinacdc.cn/kyjz/202001/t20200121\\_211337.html](https://ivdc.chinacdc.cn/kyjz/202001/t20200121_211337.html) (accessed on 21 September 2023).
- 61 CDC. Coronavirus Disease 2019 (COVID-19). Centers for Disease Control and Prevention. Available online: <https://www.cdc.gov/coronavirus/2019-ncov/index.html> (accessed on 21 September 2023).

62 Health TMoP. Diagnostic detection of Novel Coronavirus 2019 by Real Time RT-PCR. 2020. Available online: <https://www.who.int/docs/default-source/coronaviruse/protocol-v2-1.pdf> (accessed on 21 September 2023).

**Supplementary Table S2. Samples submitted after Jan 1, 2022, with mutations occurring in both HKU-ORF1b and HKU-N primers/probe binding sites.**

| sample           | location       | time       | HKU-ORF1b  | HKU-N      |
|------------------|----------------|------------|------------|------------|
| EPI_ISL_892024   | Japan          | 2022-01-07 | 18859:G->T | 29253:C->T |
| EPI_ISL_9210836  | Japan          | 2022-01-04 | 18854:G->A | 29247:C->T |
| EPI_ISL_9229990  | France         | 2022-01-04 | 18905:G->A | 29146:A->G |
| EPI_ISL_9437066  | Japan          | 2022-01-16 | 18854:G->A | 29247:C->T |
| EPI_ISL_9472680  | USA            | 2022-01-18 | 18788:C->T | 29254:G->T |
| EPI_ISL_9949108  | Spain          | 2022-02-07 | 18905:G->A | 29250:C->T |
| EPI_ISL_10444027 | Bulgaria       | 2022-01-06 | 18788:C->A | 29183:A->C |
| EPI_ISL_10444026 | Bulgaria       | 2022-01-06 | 18788:C->A | 29183:A->C |
| EPI_ISL_10667821 | Japan          | 2022-01-17 | 18854:G->A | 29247:C->T |
| EPI_ISL_10667820 | Japan          | 2022-01-17 | 18854:G->A | 29247:C->T |
| EPI_ISL_10667814 | Japan          | 2022-01-15 | 18854:G->A | 29247:C->T |
| EPI_ISL_10749631 | Germany        | 2022-02-14 | 18795:C->T | 29249:C->T |
| EPI_ISL_10807455 | Japan          | 2022-01-19 | 18854:G->A | 29247:C->T |
| EPI_ISL_11300409 | Japan          | 2022-01-14 | 18854:G->A | 29247:C->T |
| EPI_ISL_11372287 | France         | 2022-01-08 | 18905:G->A | 29253:C->T |
| EPI_ISL_11450704 | India          | 2022-01-03 | 18906:T->C | 29149:C->T |
| EPI_ISL_11479776 | Germany        | 2022-03-12 | 18855:T->C | 29149:C->T |
| EPI_ISL_12400105 | Denmark        | 2022-04-05 | 18788:C->T | 29247:C->T |
| EPI_ISL_12451374 | Luxembourg     | 2022-04-11 | 18788:C->T | 29185:T->A |
| EPI_ISL_12703300 | Luxembourg     | 2022-04-23 | 18849:T->C | 29244:T->C |
| EPI_ISL_13014191 | Germany        | 2022-05-19 | 18855:T->C | 29149:C->T |
| EPI_ISL_12858463 | USA            | 2022-05-10 | 18788:C->T | 29185:T->A |
| EPI_ISL_12708054 | USA            | 2022-05-05 | 18788:C->T | 29185:T->A |
| EPI_ISL_12707433 | USA            | 2022-05-04 | 18788:C->T | 29185:T->A |
| EPI_ISL_13134757 | Malaysia       | 2022-05-17 | 18859:G->T | 29197:C->T |
| EPI_ISL_13297846 | Italy          | 2022-06-07 | 18788:C->T | 29253:C->T |
| EPI_ISL_13389585 | Belgium        | 2022-05-27 | 18795:C->T | 29179:G->T |
| EPI_ISL_13463610 | Panama         | 2022-06-04 | 18795:C->T | 29179:G->T |
| EPI_ISL_14541159 | Japan          | 2022-07-31 | 18888:C->T | 29179:G->T |
| EPI_ISL_15083835 | Italy          | 2022-09-19 | 18796:C->T | 29247:C->T |
| EPI_ISL_15149196 | Germany        | 2022-09-16 | 18907:G->T | 29250:C->A |
| EPI_ISL_15867442 | Russia         | 2022-04-23 | 18795:C->T | 29151:G->A |
| EPI_ISL_16024682 | Sweden         | 2022-11-25 | 18792:T->C | 29250:C->T |
| EPI_ISL_16027399 | Panama         | 2022-05-28 | 18795:C->T | 29179:G->T |
| EPI_ISL_17004583 | Germany        | 2023-02-09 | 18788:C->T | 29149:C->T |
| EPI_ISL_17069351 | Germany        | 2023-02-16 | 18788:C->T | 29149:C->T |
| EPI_ISL_17069245 | Germany        | 2023-02-16 | 18788:C->T | 29149:C->T |
| EPI_ISL_17090748 | South Korea    | 2023-02-05 | 18863:T->G | 29249:C->T |
| EPI_ISL_17094806 | United Kingdom | 2023-02-19 | 18855:T->C | 29185:T->A |
| EPI_ISL_17294438 | South Korea    | 2023-03-04 | 18863:T->G | 29239:G->A |
| EPI_ISL_16211697 | Spain          | 2022-05-05 | 18888:C->A | 29162:G->T |

|                  |             |            |            |            |
|------------------|-------------|------------|------------|------------|
| EPI_ISL_17473524 | South Korea | 2023-03-23 | 18891:G->A | 29148:T->C |
| EPI_ISL_17605431 | Canada      | 2023-04-12 | 18855:T->C | 29185:T->A |
| EPI_ISL_17765614 | Australia   | 2023-05-09 | 18855:T->C | 29247:C->T |

---

**Supplementary Table S3. Mutation ratio for commonly used assays and double mutation ratio for dual-assays.**

| <b>Assay</b>    | <b>Forward<br/>Primer(%)</b> | <b>Reverse<br/>primer(%)</b> | <b>Probe(%)</b> | <b>Double mutation<br/>count/total sample</b> |
|-----------------|------------------------------|------------------------------|-----------------|-----------------------------------------------|
| ChinaCDC-ORF1ab | 0.29407                      | 0.18063                      | 0.32947         | 16434/2451477                                 |
| ChinaCDC-N      | 85.71816                     | 37.23029                     | 0.29256         |                                               |
| Charite-RdRP    | 24.99228                     | 0.17267                      | 0.20110         | 59165/2451477                                 |
| Charite-E       | 19.63616                     | 0.07200                      | 0.11063         |                                               |
| HKU-ORF1b       | 0.32980                      | 0.55575                      | 0.14171         | 588/2451477                                   |
| HKU-N           | 0.46237                      | 1.36028                      | 1.47368         |                                               |
| USACDC-N1       | 3.26758                      | 0.54082                      | 20.85547        | 2048/2451477                                  |
| USACDC-N2       | 0.96509                      | 0.47918                      | 1.36616         |                                               |
| USACDC-N3       | 1.57787                      | 0.93021                      | 1.51945         |                                               |
| Thailand-N      | 1.75874                      | 18.36530                     | 0.35456         | 1184/2451477                                  |
| IP2             | 0.05621                      | 1.57317                      | 0.57635         |                                               |
| IP4             | 0.06555                      | 0.74816                      | 4.93123         |                                               |
| Japan-NIID-N    | 0.54579                      | 1.03109                      | 0.43990         |                                               |

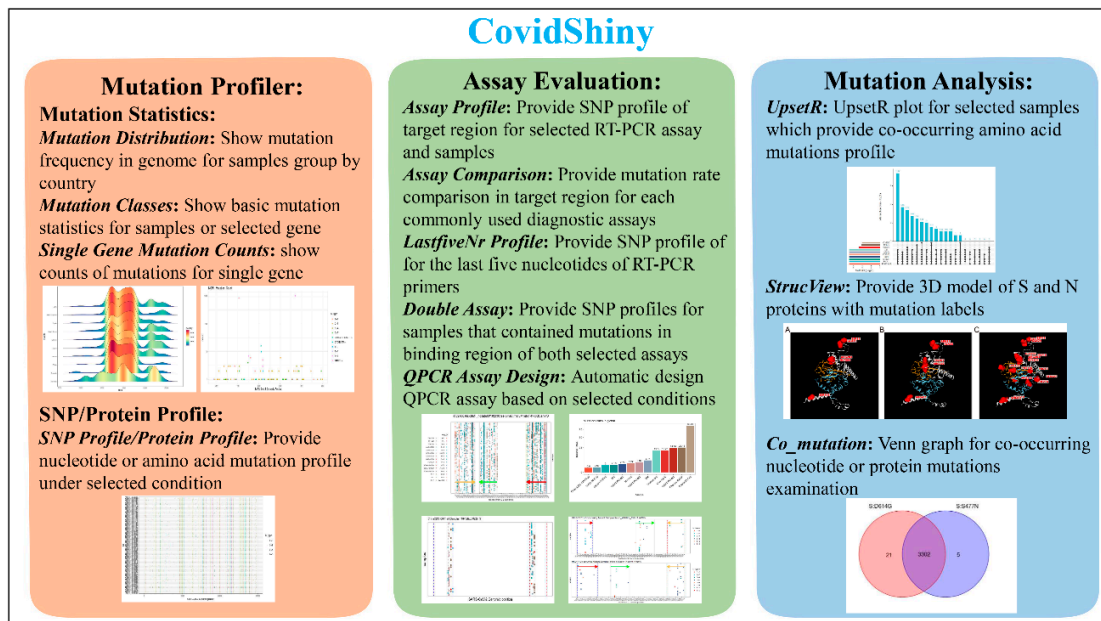

**Supplementary Figure S1. Overview and brief annotation for all modules and functions of CovidShiny**

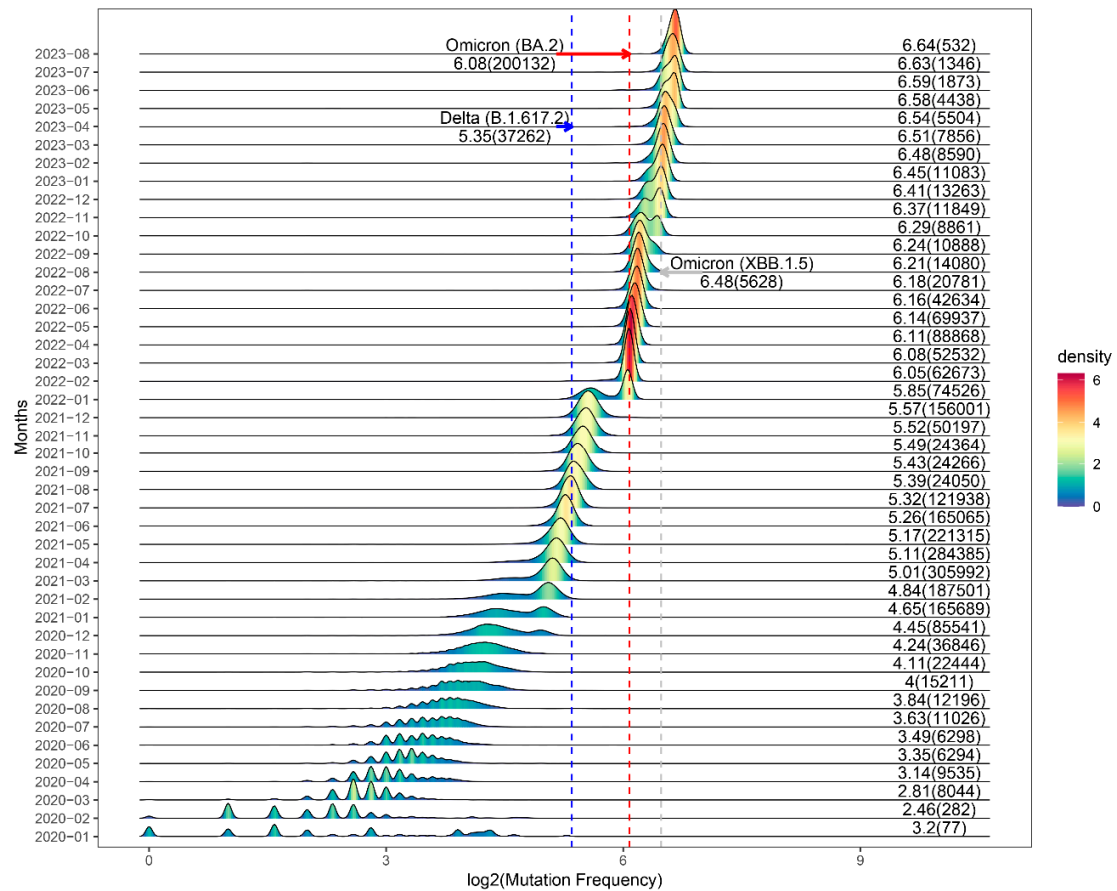

**Supplementary Figure S2. The density ridgeline plot of mutation frequency accumulation since 2020-01. The number shown on the right side of the plot is the log<sub>2</sub> transformed average mutation counts of SARS-CoV-2 in a month (with a total sample number per month in brackets). Dash lines indicate the average log<sub>2</sub> transformed average mutation counts of three variants, the value is labeled on the site with the sample number in bracket. (Blue line: Delta(B.1.617.2), Red line: Omicron(BA.2), Grey line: Omicron(XBB.1.5))**
